# Supplementary material for: Synthesis, structure, and electrochemical properties of O′3-type monoclinic NaNi0.8Co0.15Al0.05O2 cathode materials for sodium-ion batteries
Source: Royal Society of Chemistry journal article supplement (doi:10.1039/c8ta07842d), 2018-11-29
Supplement: c8ta07842d1.pdf [file c8ta07842d1.pdf]

## Supporting Information

### Synthesis, Structure, and Electrochemical Properties of the O3-Type Monoclinic

### NaNi<sub>0.8</sub>Co<sub>0.15</sub>Al<sub>0.05</sub>O<sub>2</sub> Cathode Materials for Sodium-Ion Batteries

Pengfei Zhou, Xiaolan Liu, Junying Weng, Li Wang, Xiaozhong Wu, Zhichao Miao, Jinping Zhao, Jin Zhou, Shuping Zhuo\*

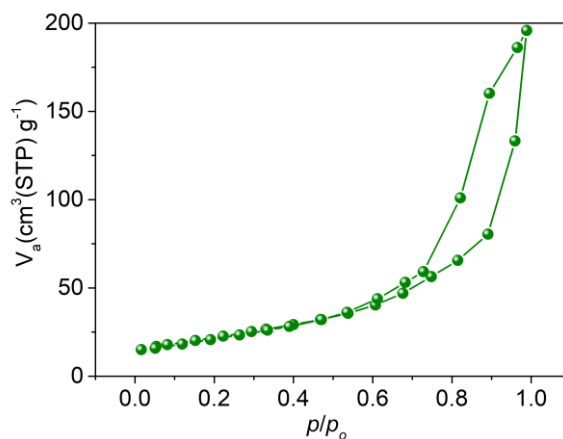

Fig. S1. N<sub>2</sub> adsorption/desorption isotherm of Ni<sub>0.8</sub>Co<sub>0.15</sub>Al<sub>0.05</sub>(OH)<sub>2</sub> precursor.

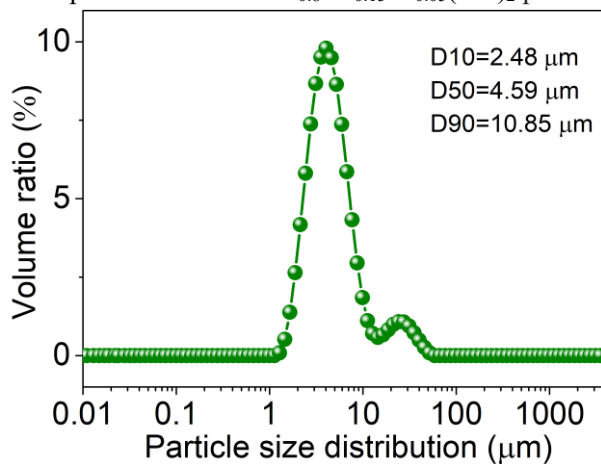

Fig. S2. Particle size distribution of Ni<sub>0.8</sub>Co<sub>0.15</sub>Al<sub>0.05</sub>(OH)<sub>2</sub> precursor.

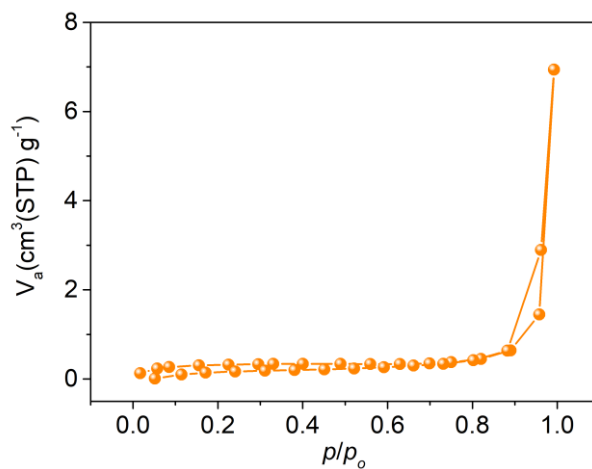

Fig. S3. N<sub>2</sub> adsorption/desorption isotherm of NaNi<sub>0.8</sub>Co<sub>0.15</sub>Al<sub>0.05</sub>O<sub>2</sub> material.

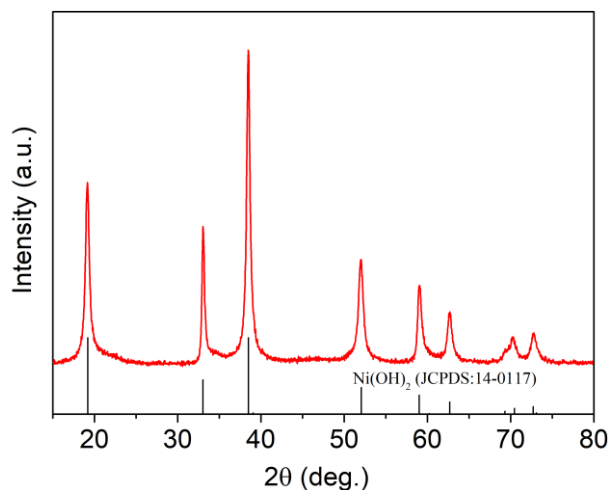

**Fig. S4.** XRD pattern of  $\text{Ni}_{0.8}\text{Co}_{0.15}\text{Al}_{0.05}(\text{OH})_2$  precursor.

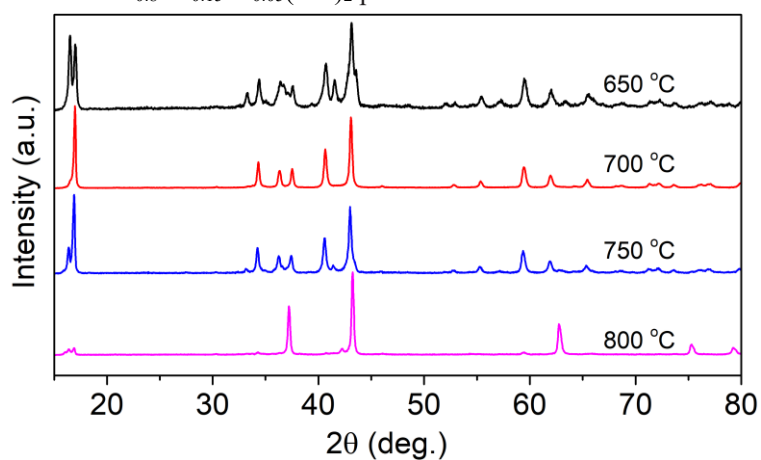

**Fig. S5.** XRD patterns of  $\text{NaNi}_{0.8}\text{Co}_{0.15}\text{Al}_{0.05}\text{O}_2$  calcined at 650, 700, 750 and 800 °C.

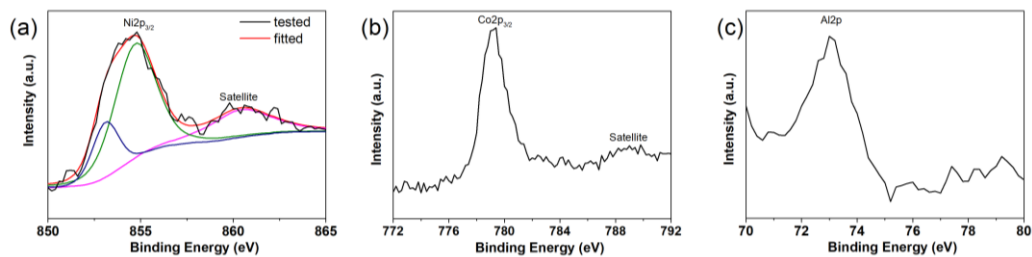

**Fig. S6.** XPS data of  $\text{Ni}2p$ ,  $\text{Co}2p$ ,  $\text{Al}2p$  for  $\text{NaNi}_{0.8}\text{Co}_{0.15}\text{Al}_{0.05}\text{O}_2$

The bulk  $\text{NaNiO}_2$  was synthesized by solid-state reaction of  $\text{NiO}$  and  $\text{Na}_2\text{O}_2$  (5% excess) at 650 °C for 10 h under  $\text{O}_2$ .

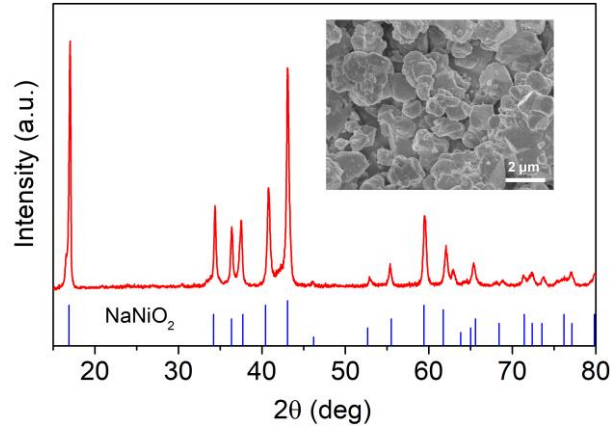

**Fig. S7.** XRD pattern and SEM image of NaNiO<sub>2</sub> material.

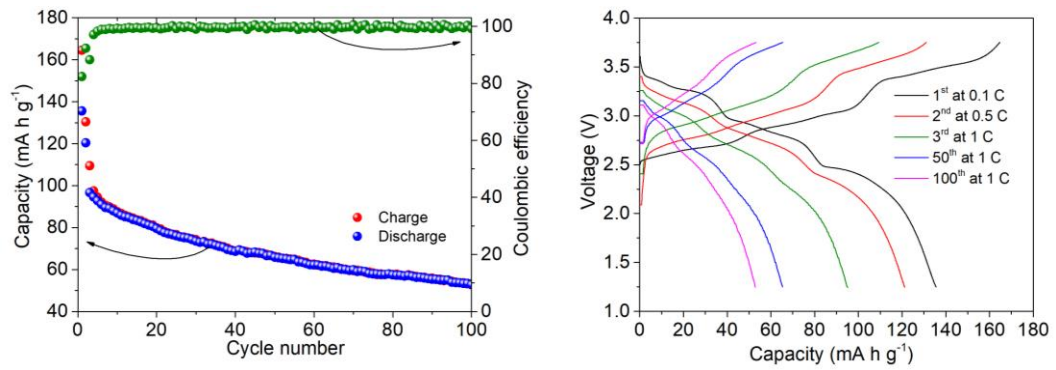

**Fig. S8.** Electrochemical performance of NaNiO<sub>2</sub> material, (a) cycling performance, (b) charge/discharge curves.

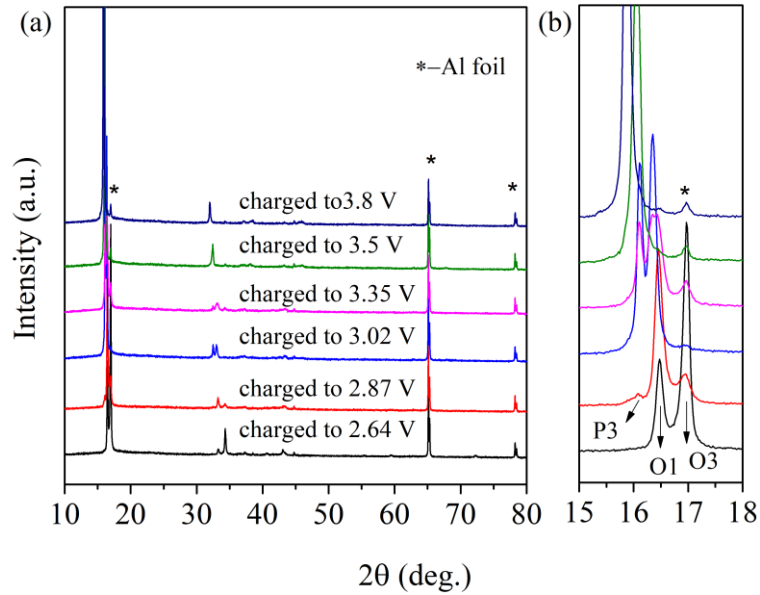

**Fig. S9.** Ex-situ XRD patterns of Na<sub>1-x</sub>Ni<sub>0.8</sub>Co<sub>0.15</sub>Al<sub>0.05</sub>O<sub>2</sub> electrode charged at various voltages.

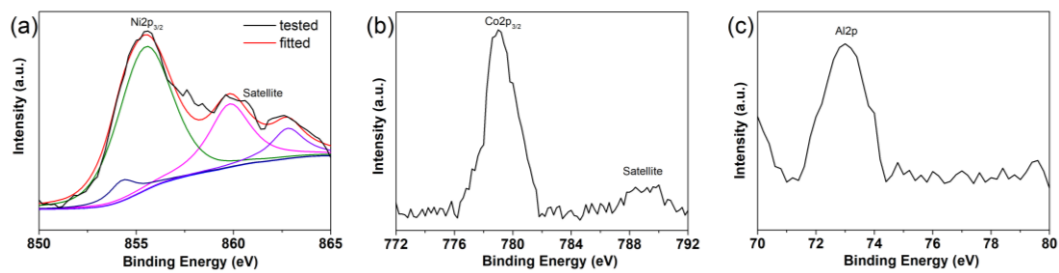

**Fig. S10.** XPS data of Ni2p, Co2p, Al2p for charged  $\text{Na}_{1-x}\text{Ni}_{0.8}\text{Co}_{0.15}\text{Al}_{0.05}\text{O}_2$  electrode.

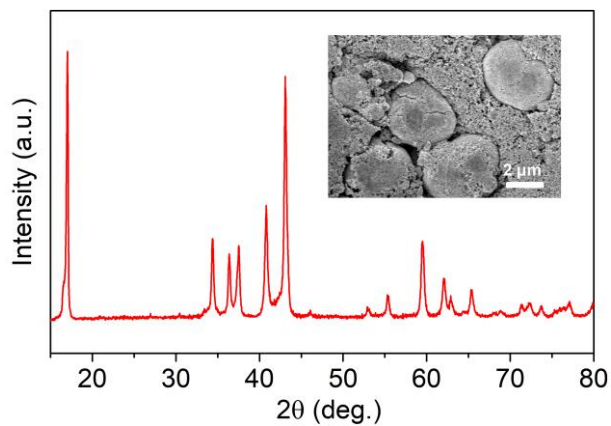

**Fig. S11.** XRD pattern and SEM image of  $\text{NaNi}_{0.8}\text{Co}_{0.15}\text{Al}_{0.05}\text{O}_2$  after 100 cycles at 1 C.

**Table S1.** Comparison in terms of cycling performance for Ni-based cathode materials.

| Formula                                                                                                   | Cycling performance                                                                   |
|-----------------------------------------------------------------------------------------------------------|---------------------------------------------------------------------------------------|
| $\text{NaNi}_{0.5}\text{Ti}_{0.5}\text{O}_2^1$                                                            | 67.5 mAh g <sup>-1</sup> at 100 mA g <sup>-1</sup> after 300 cycles in 2.0-4.0 V, 75% |
| $\text{Na}[\text{Ni}_{0.6}\text{Co}_{0.05}\text{Mn}_{0.35}]\text{O}_2^2$                                  | 125.7 mAh g <sup>-1</sup> at 75 mA g <sup>-1</sup> after 100 cycles in 2.0-4.2 V, 80% |
| $\text{NaLi}_{0.1}\text{Ni}_{0.35}\text{Mn}_{0.55}\text{O}_2^3$                                           | 102 mAh g <sup>-1</sup> at 12 mA g <sup>-1</sup> after 100 cycles in 2.0-4.2 V, 85%   |
| $\text{Na}_{0.9}[\text{Ni}_{0.4}\text{Mn}_4\text{Ti}_{0.2}]\text{O}_2^4$                                  | 95.5 mAh g <sup>-1</sup> at 1 C after 200 cycles in 2.5-4.1 V, 86.8%                  |
| $\text{NaNi}_{0.5}\text{Mn}_{0.2}\text{Ti}_{0.3}\text{O}_2^5$                                             | 97.5 mAh g <sup>-1</sup> at 240 mA g <sup>-1</sup> after 200 cycles in 2.0-4.2 V, 78% |
| $\text{Na}[\text{Li}_{0.05}\text{Mn}_{0.50}\text{Ni}_{0.30}\text{Cu}_{0.10}\text{Mg}_{0.05}]\text{O}_2^6$ | 100 mAh g <sup>-1</sup> at 1 C after 400 cycles in 2.0-4.2 V, 81.6%                   |
| $\text{NaNi}_{1/3}\text{Mn}_{1/3}\text{Co}_{1/3}\text{O}_2^7$                                             | 120 mAh g <sup>-1</sup> at 0.1 C after 50 cycles in 2.5-3.75 V                        |
| $\text{NaNi}_{0.5}\text{Mn}_{0.5}\text{O}_2^8$                                                            | 127 mAh g <sup>-1</sup> at 12 mA g <sup>-1</sup> after 100 cycles in 2-4 V, 90%       |
| $\text{Na}_{0.8}\text{Ni}_{0.3}\text{Co}_{0.1}\text{Ti}_{0.6}\text{O}_2^9$                                | 84.6 mAh g <sup>-1</sup> at 50 mA g <sup>-1</sup> after 300 cycles in 2-4 V, 92%      |

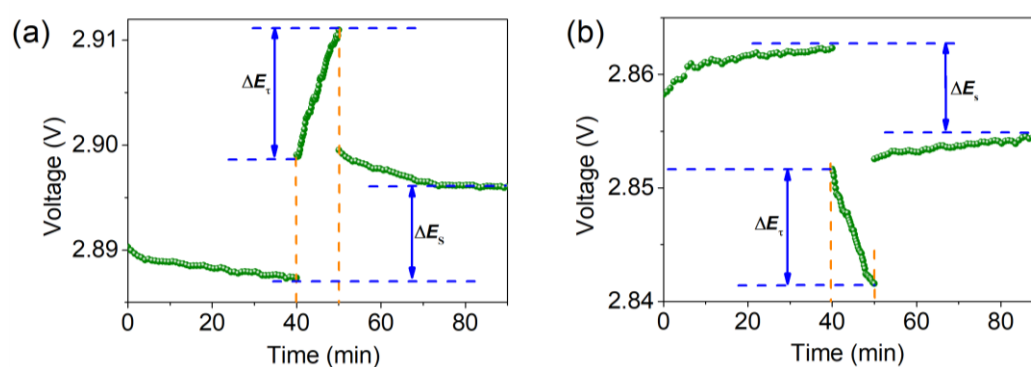**Fig. S12.** Scheme for the voltage response of (a) a charge pulse at around 2.9 V and (b) a discharge pulse at around 2.85 V in the GITT experiment with labeling of parameters.

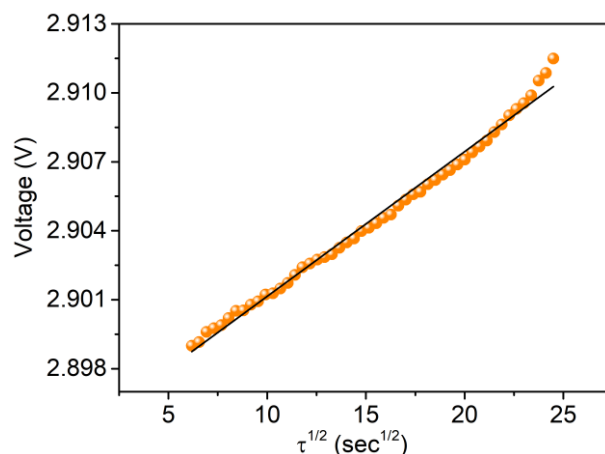

**Fig. S13.** Plot of voltage vs.  $\tau^{1/2}$  to show the linear fit.

### References

1. H. Yu, S. Guo, Y. Zhu, M. Ishida, H. Zhou, *Chemical Communications*, 2014, **50** (4), 457-9.
2. J. Y. Hwang; S. M. Oh; S. T. Myung; K. Y. Chung; I. Belharouak; Y. K. Sun, *Nature Communications*, 2015, **6**, 6865.
3. S. Zheng, G. Zhong, M. J. McDonald, Z. Gong, R. Liu, W. Wen, C Yang, Y. Yang, *Journal of Materials Chemistry A*, 2016, **4** (23), 9054-9062.
4. X. Qi, Y. Wang, L. Jiang, L. Mu, C. Zhao, L. Liu, Y. S. Hu, L. Chen, X. Huang, *Particle & Particle Systems Characterization*, 2016, **33** (8), 538-544.
5. P. F. Wang, H. R. Yao, X. Y. Liu, J. N. Zhang, L. Gu, X. Q. Yu, Y. X. Yin, Y. G. Guo, *Advanced materials*, 2017, **29** (19).
6. J. Deng, W. B. Luo, X. Lu, Q. Yao, Z. Wang, H. K. Liu, H. Zhou, S. X. Dou, *Advanced Energy Materials*, 2018, **8** (5), 1701610.
7. M. Sathiya, K. Hemalatha, K. Ramesha, J. M. Tarascon, A. S. Prakash, *Chemistry of Materials*, 2012, **24** (10), 1846-1853.
8. P. F. Wang, Y. You, Y. X. Yin, Y. G. Guo, *Journal of Materials Chemistry A*, 2016, **4** (45): 17660-17664.
9. S. H. Guo, Y. Sun, P. Liu, J. Y, P. He, X. Y. Zhang, Y. B. Zhu, R. Senga, K. Suenaga, M. W. Chen, H. S. Zhou, *Science Bulletin*, 2018, **63** (6): 376-384.
